# Supplementary material for: SOX2 Is a Univocal Marker for Human Oral Mucosa Epithelium Useful in Post-COMET Patient Characterization
Source: MDPI journal article supplement (doi:10.3390/ijms23105785), 2022-05-21

## **Supplementary Materials and Data**

### **Supplementary Data**

**Table S1: Strains and number of holoclones analyzed.** The holoclones analyzed by microarray derived from two strains for each epithelium. Abbreviations: CON, conjunctiva; LE, limbus; MO, oral mucosa.

| Epithelium  | Strain | N. of holoclones |
|-------------|--------|------------------|
| Conjunctiva | CON-89 | 6                |
|             | CON-90 | 3                |
| Limbus      | LE-51  | 2                |
|             | LE-113 | 6                |
| Oral Mucosa | MO-14  | 6                |
|             | MO-34  | 9                |

### **Supplementary Materials**

#### **Cell cultures**

Samples derived from the three epithelia were treated with trypsin (0.05% trypsin and 0.01% EDTA) at 37°C for about 120 min. Cells were collected every 30 mins and then seeded on lethally irradiated 3T3-J2 feeder layer, then cultured in 5% CO<sub>2</sub>. Culture medium used was DMEM and Ham's F12 media (2:1 mixture) containing FBS (10%) and penicillin/streptomycin, insulin (5 µg/mL), adenine (0.18 mM), hydrocortisone (0.4 µg/mL), cholera toxin (0.1 nM), triiodothyronine (2 nM), glutamine (4 mM). Epidermal growth factor was added at 10 ng/mL beginning at the first feeding, 3 days after plating. Cultures were then fed every other day. Subconfluent primary cultures were passaged at a density of 6-8.3x10<sup>3</sup> cells/cm<sup>2</sup> and cultured as above.

For the stratification experiment, oral mucosa keratinocytes were cultured until confluence and then kept stratifying for 7 days, changing the media every other day. Growth was checked under the light microscope, and images were taken.

#### **Clonal analysis and Colony Forming Efficiency assay**

Sub-confluent epithelial cultures were trypsinized, serially diluted and plated in 96-well plates (0.5 cells per well). After 7 days of cultivation, single clones were identified under an inverted microscope and trypsinized. One-quarter of the clone was used for Colony Forming Efficiency (CFE) assay. It was cultured for 12 days onto a 100-mm (indicator) dish, which was then fixed and stained with rhodamine B to classify clonal type [31]. The remaining three-quarters of the clone was subcultured for proteins and RNA extraction and further analysis.

#### **Real-time RT-PCR**

Total RNA was isolated with the Invitrogen™ PureLink™ RNA Micro Scale Kit (Thermo Fisher), according to the manufacturer's protocol. cDNA was synthesized using SuperScript IV VILO Master Mix (Thermo Fisher). Real Time quantitative RT-PCR was performed by using TaqMan assays for PAX6 (Hs00240871\_m1), SOX2 (Hs01053049\_s1) and GAPDH (Hs99999905\_m1), Taqman Fast Advanced Master Mix (all by Thermo Fisher) and the 7900HT Fast Real-Time PCR System (Applied Biosystems). The expression of target genes was normalized to the level of

GAPDH in the same cDNA by using the  $2^{-\Delta\Delta CT}$  quantification. For statistical analysis Mann-Whitney test was applied.

## Immunohistochemistry

**Table S2: Primary Antibodies used for IF or IHC.**

| Target                    | Clone or n. of catalogue | Company         | Dilution           |
|---------------------------|--------------------------|-----------------|--------------------|
| <b>SOX2 (IF)</b>          | D6D9                     | Cell Signalling | 1:100              |
| <b>SOX2 (IHC)</b>         | SP-76                    | Cell Marque     | ready-to-use       |
| <b>PAX6 (IF)(IHC)</b>     | Poly19013                | Biolegend       | 1:3000 (IHC 1:500) |
| <b>Keratin 3-76 (IF)</b>  | AE5                      | Progen          | 1:100              |
| <b>Keratin 3-2p (IHC)</b> | AE5                      | Santa Cruz      | 1:300              |
| <b>Keratin 13 (IF)</b>    | GP-K13                   | Progen          | 1:100              |
| <b>Keratin 13 (IHC)</b>   | EPR3672                  | Abcam           | 1:100              |
| <b>Keratin 12 (IHC)</b>   | EPR17882                 | Abcam           | 1:1000             |

## Western blot analyses

For protein extraction, pelleted cells were lysate with RIPA buffer at 4°C. Equal amounts of proteins were electrophoresed on NuPAGE (Invitrogen) 4-12% bis-tris sodium dodecyl sulfate-polyacrylamide gels under reducing conditions and transferred to nitrocellulose membranes and then blocked with 5% milk in PBS-Tween 0.1% buffer. Immunoreactions were performed using different antibodies diluted in blocking solution as listed in Table S3. Protein detection was carried out using a chemiluminescent labelling reagent (SuperSignal West Pico Chemiluminescent Substrate; Thermo Scientific).

**Table S3: Primary Antibodies used for WB.**

| Target            | Clone or n. of catalogue | Company            | WB dilution |
|-------------------|--------------------------|--------------------|-------------|
| <b>GAPDH</b>      | 6C5                      | Abcam              | 1:10000     |
| <b>Involucrin</b> | SY5                      | Leica Microsystems | 1:10000     |
| <b>Keratin 13</b> | EPR3672                  | Abcam              | 1:1000      |
| <b>PAX6</b>       | Poly19013                | Biolegend          | 1:2000      |
| <b>p63-α</b>      | custom                   | PRIMM              | 1:5000      |
| <b>SOX2</b>       | D6D9                     | Cell Signalling    | 1:200       |

Supplementary Figures

Original Images for Blots

Blot Figure 3D

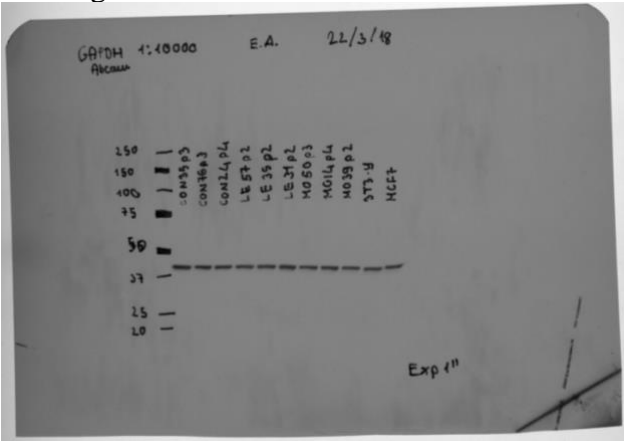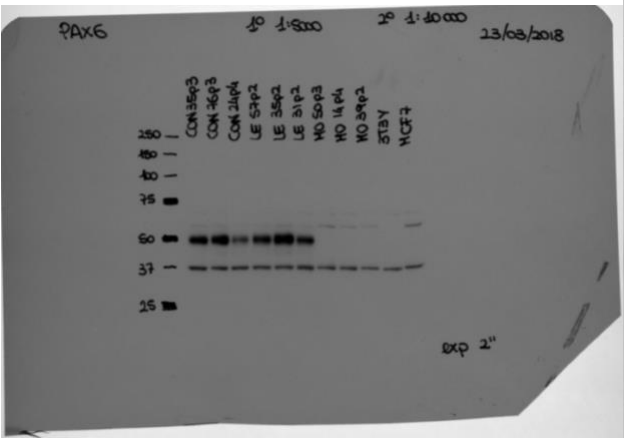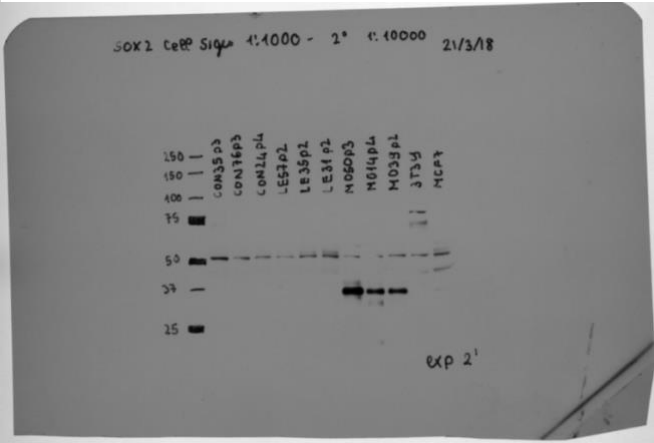

# Blot Figure 3E

Order of samples (from left to right):

- MO14 p4 subconfluence
- MO14 p4 stratified
- MO50 p2 subconfluence
- MO50 p2 stratified
- MO39 p4 subconfluence
- MO39 p4 stratified
- LE31 p2 subconfluence
- LE31 p2 stratified
- 3T3
- UMSCC-14c

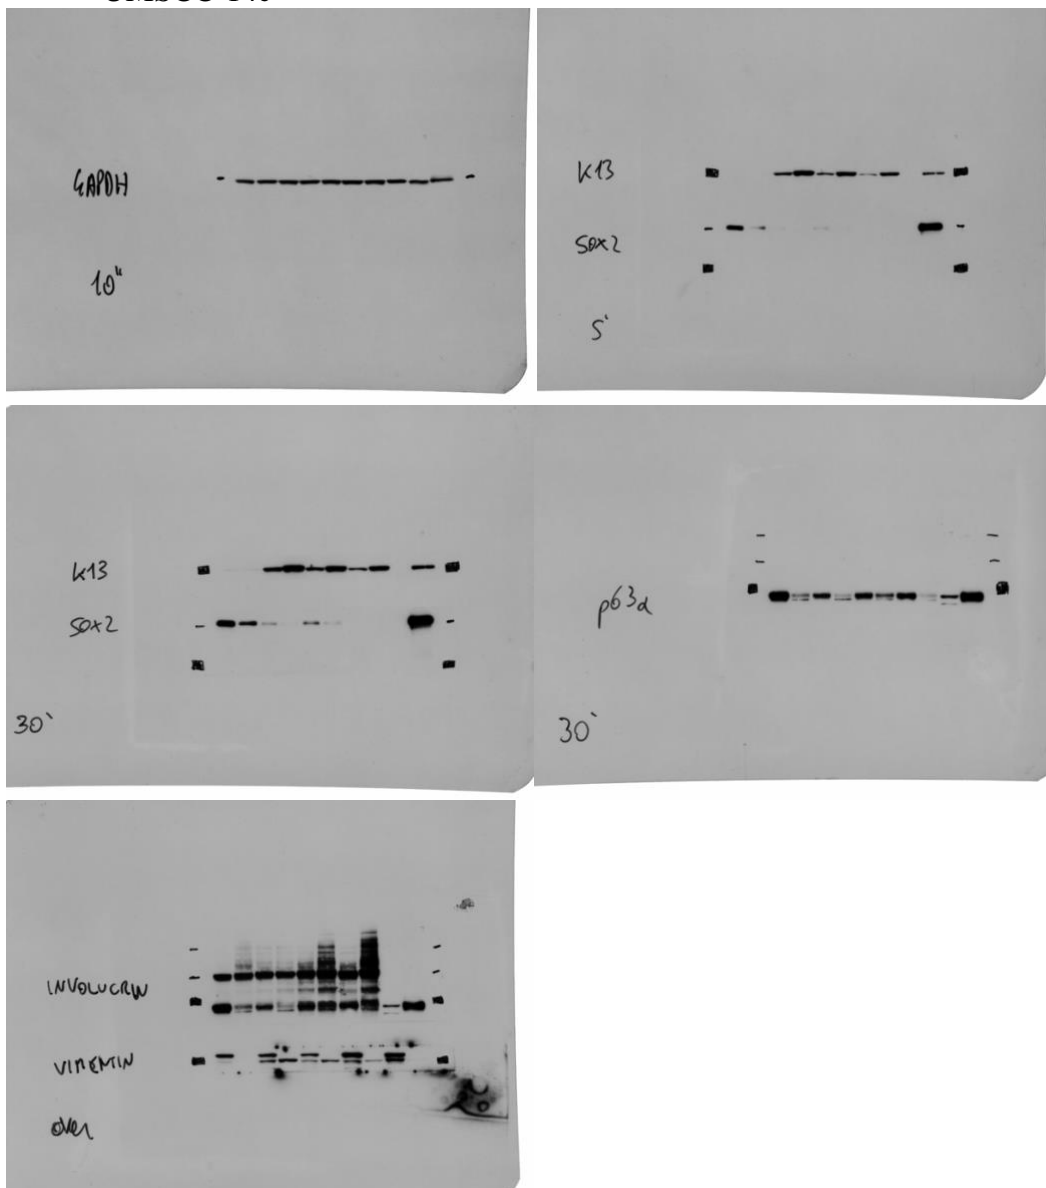

Supplement: s1 [file s1]
