# Supplementary material for: SOX2 Is a Univocal Marker for Human Oral Mucosa Epithelium Useful in Post-COMET Patient Characterization
Source: Int J Mol Sci. 2022 May 21;23(10):5785. doi: 10.3390/ijms23105785 (PMC9144017; doi:10.3390/ijms23105785)
Supplement: Supplementary file 1 [file ijms-23-05785-s001.zip]

Archive with 9 entries (9 files):
- Figure 1_V2-01.pdf
- Figure 2_V2-01.pdf
- Figure 3.pdf
- Figure 4.pdf
- Figure S1.pdf
- Spreadsheet S1.xlsx
- Spreadsheet S2.xlsx
- Spreadsheet S3.xlsx
- Supplementary Materials and Data REV. 17-5-22.pdf
