# Supplementary material for: SOX2 Is a Univocal Marker for Human Oral Mucosa Epithelium Useful in Post-COMET Patient Characterization
Source: Int J Mol Sci. 2022 May 21;23(10):5785. doi: 10.3390/ijms23105785 (PMC9144017; doi:10.3390/ijms23105785)
Supplement: Supplementary file 1 [file ijms-23-05785-s001.zip › Spreadsheet S1.xlsx]

## Sheet: Table S1
Spreadsheet S1. Differentially expressed in oral mucosa vs conjunctiva (Fold Change contrast=2; FDR<0.05)
Probeset ID	Gene Symbol	Gene Title	RefSeq Transcript ID		p-value(LIMBUS vs. CONJUNCTIVA)	stepup(p-value(LIMBUS vs. CONJUNCTIVA))	Fold-Change(LIMBUS vs. CONJUNCTIVA)	p-value(ORAL vs. CONJUNCTIVA)	stepup(p-value(ORAL vs. CONJUNCTIVA))	Fold-Change(ORAL vs. CONJUNCTIVA)	p-value(ORAL vs. LIMBUS)	stepup(p-value(ORAL vs. LIMBUS))	Fold-Change(ORAL vs. LIMBUS)
207558_s_at	PITX2	paired-like homeodomain 2	NM_000325 /// NM_001204397 /// NM_001204398 /// NM_001204399 /// NM_153426 /// NM_15342		0.311963	0.99974	1.17397	1.98982e-05	0.00528124	77.2803	3.06125e-05	0.0137191	65.8282
228038_at	SOX2	SRY (sex determining region Y)-box 2	NM_003106		0.468727	0.99974	1.09152	1.64264e-06	0.000805445	33.0998	2.73566e-06	0.00240278	30.3244
239430_at	IGFL1	IGF-like family member 1	NM_198541		0.00086887	0.233752	5.69546	6.04938e-05	0.0116873	17.7792	0.00278903	0.242143	3.12164
200951_s_at	CCND2	cyclin D2	NM_001759 /// XM_005253813		0.0074489	0.65163	2.86483	0.000271023	0.0337544	9.17856	0.00371019	0.271923	3.20388
211964_at	COL4A2	collagen, type IV, alpha 2	NM_001846		1.85613e-06	0.00306706	6.10896	1.40294e-07	0.000109579	8.71772	0.0151528	0.47447	1.42704
216250_s_at	LPXN	leupaxin	NM_001143995 /// NM_004811 /// XM_006718750		0.342631	0.99974	1.22321	0.000478496	0.0482689	7.60006	0.000928775	0.131216	6.21321
211980_at	COL4A1	collagen, type IV, alpha 1	NM_001845		9.05513e-19	4.95089e-14	4.86085	2.32721e-23	6.36202e-19	7.03821	3.41817e-06	0.00278938	1.44794
1563933_a_at	PLD5	phospholipase D family, member 5	NM_001195811 /// NM_001195812 /// NM_152666 /// XM_006711752		0.245694	0.99974	1.27323	5.82364e-05	0.0113717	6.50403	0.000181603	0.0466158	5.10829
1557779_at	LOC101928687	uncharacterized LOC101928687	NR_120641 /// NR_120642 /// XR_246116 /// XR_247522 /// XR_252750		0.261145	0.99974	1.11753	1.16225e-10	2.26949e-07	6.35635	6.13206e-10	1.86261e-06	5.68787
232082_x_at	SPRR3	small proline-rich protein 3	NM_001097589 /// NM_005416		0.00699405	0.640535	2.21535	0.000325955	0.0382459	4.46398	0.00752838	0.375425	2.01502
211538_s_at	HSPA2	heat shock 70kDa protein 2	NM_021979		0.0033322	0.447637	1.79494	2.22525e-05	0.00573676	3.88973	0.000568387	0.100898	2.16705
204602_at	DKK1	dickkopf WNT signaling pathway inhibitor 1	NM_012242		0.00111061	0.258069	1.23342	3.75965e-21	4.11118e-17	3.66125	3.97846e-18	1.08761e-13	2.96837
231259_s_at	CCND2	cyclin D2	NM_001759 /// XM_005253813		0.000478115	0.164408	1.73776	1.54106e-06	0.000786288	3.61684	6.01327e-05	0.02163	2.08133
237435_at	---	---	---		0.137507	0.99974	-1.21633	2.06799e-05	0.00543594	3.03269	1.41162e-05	0.00779601	3.68875
236101_at	---	---	---		0.519233	0.99974	1.0699	0.000217479	0.0295787	3.03015	0.000390585	0.0779099	2.83217
219975_x_at	OLAH	oleoyl-ACP hydrolase	NM_001039702 /// NM_018324 /// XM_006717456		0.315533	0.99974	1.17048	0.000495436	0.0490724	3.0025	0.00135367	0.163743	2.56519
227072_at	RTTN	rotatin	NM_173630 /// XM_005266679 /// XM_006722434 /// XM_006722435 /// XR_430072		0.0757612	0.99974	1.28893	0.000354615	0.0399765	2.85391	0.0013902	0.165148	2.21416
216244_at	IL1RN	interleukin 1 receptor antagonist	NM_000577 /// NM_173841 /// NM_173842 /// NM_173843 /// XM_005263661 /// XM_006712497		0.0228034	0.951738	1.56755	0.000442272	0.0461474	2.84416	0.00583515	0.332677	1.81439
238050_at	ANTXR2	anthrax toxin receptor 2	NM_001145794 /// NM_001286780 /// NM_001286781 /// NM_058172		0.138559	0.99974	1.2185	0.000190035	0.0271283	2.75754	0.000726419	0.115636	2.26306
213721_at	SOX2	SRY (sex determining region Y)-box 2	NM_003106		0.317056	0.99974	1.06134	8.6297e-07	0.000491488	2.71736	2.10722e-06	0.0020065	2.56032
220174_at	LRRC8E	leucine rich repeat containing 8 family, member E	NM_001268284 /// NM_001268285 /// NM_025061 /// XM_005272497		4.61627e-13	5.04789e-09	1.507	4.59224e-25	2.51081e-20	2.69118	6.93288e-18	1.26352e-13	1.78579
228293_at	DEPDC7	DEP domain containing 7	NM_001077242 /// NM_139160		0.00834023	0.670592	1.65699	0.000504663	0.0496268	2.62589	0.00799975	0.380778	1.58473
205462_s_at	HPCAL1	hippocalcin-like 1	NM_001258357 /// NM_001258358 /// NM_001258359 /// NM_002149 /// NM_134421 /// XM_00524		0.0616537	0.99974	1.30114	0.000410682	0.0437668	2.62132	0.00186865	0.199547	2.01463
204198_s_at	RUNX3	runt-related transcription factor 3	NM_001031680 /// NM_004350 /// XM_005246024 /// XM_006711016		0.730141	0.99974	1.05956	0.000227075	0.0305045	2.54142	0.000591749	0.104367	2.39856
207390_s_at	SMTN	smoothelin	NM_001207017 /// NM_001207018 /// NM_006932 /// NM_134269 /// NM_134270 /// XM_00672429		0.00406541	0.498377	1.8017	0.000365836	0.0409152	2.50251	0.0207911	0.520731	1.38898
209427_at	SMTN	smoothelin	NM_001207017 /// NM_001207018 /// NM_006932 /// NM_134269 /// NM_134270 /// XM_00672429		0.00286753	0.422593	1.73706	0.000244719	0.032123	2.34245	0.017496	0.491404	1.34851
212552_at	HPCAL1	hippocalcin-like 1	NM_001258357 /// NM_001258358 /// NM_001258359 /// NM_002149 /// NM_134421 /// XM_00524		0.0386561	0.99974	1.25944	0.000141457	0.0218478	2.31025	0.000778192	0.120532	1.83435
233126_s_at	OLAH	oleoyl-ACP hydrolase	NM_001039702 /// NM_018324 /// XM_006717456		0.298261	0.99974	1.10948	5.38869e-05	0.0107922	2.30369	0.000178942	0.0465119	2.07637
205798_at	IL7R	interleukin 7 receptor	NM_002185 /// NR_120485 /// XM_005248299 /// XM_005248300		0.0160671	0.849097	1.42306	0.000336644	0.0390786	2.21348	0.00491459	0.309212	1.55543
218610_s_at	CPPED1	calcineurin-like phosphoesterase domain containing 1	NM_001099455 /// NM_018340		0.000201731	0.090407	1.60879	4.60518e-06	0.00183787	2.16207	0.00137142	0.1646	1.34391
239135_at	CPPED1	calcineurin-like phosphoesterase domain containing 1	NM_001099455 /// NM_018340		0.00276107	0.412463	1.66208	0.000233115	0.0310111	2.16081	0.0206612	0.52037	1.30006
240994_at	---	---	---		0.350872	0.99974	1.06498	5.77187e-05	0.011311	2.1545	0.000125362	0.0358629	2.02304
204418_x_at	GSTM2	glutathione S-transferase mu 2 (muscle)	NM_000848 /// NM_001142368		0.56151	0.99974	1.02701	3.311e-05	0.00760626	2.00056	5.71439e-05	0.0211635	1.94793
227750_at	KALRN	kalirin, RhoGEF kinase	NM_001024660 /// NM_003947 /// NM_007064 /// NR_028136 /// XM_006713810 /// XM_00671381		2.67813e-09	1.22022e-05	-1.39216	1.99566e-18	1.21236e-14	-2.00479	4.45671e-11	1.87439e-07	-1.44006
1554966_a_at	FILIP1L	filamin A interacting protein 1-like	NM_001042459 /// NM_001282793 /// NM_001282794 /// NM_014890 /// NM_182909 /// XM_00671		0.0894918	0.99974	1.12937	1.64993e-06	0.000805445	-2.01943	1.0592e-06	0.00123216	-2.28069
210085_s_at	ANXA9	annexin A9	NM_003568 /// XM_005245539		4.56353e-06	0.00542415	-1.68406	5.04653e-08	4.6766e-05	-2.03394	0.00400599	0.279383	-1.20776
201041_s_at	DUSP1	dual specificity phosphatase 1	NM_004417		0.350504	0.99974	-1.0845	0.000497153	0.0491082	-2.0367	0.00109174	0.142996	-1.87801
203632_s_at	GPRC5B	G protein-coupled receptor, class C, group 5, member B	NM_016235 /// XM_005255357 /// XM_006721051 /// XM_006721052		0.00730607	0.647611	-1.50851	0.000247238	0.0322619	-2.04022	0.0162672	0.486281	-1.35247
206167_s_at	ARHGAP6	Rho GTPase activating protein 6	NM_001174 /// NM_001287242 /// NM_006125 /// NM_013422 /// NM_013423 /// NM_013427 ///		5.02608e-09	2.11385e-05	-1.87498	1.71894e-11	4.47537e-08	-2.0874	0.0595145	0.641651	-1.11329
1563022_at	CCDC160	coiled-coil domain containing 160	NM_001101357 /// XM_005262408 /// XM_005262409 /// XM_005262410		0.00092906	0.243045	-1.64541	5.33353e-05	0.0107227	-2.10898	0.0115619	0.434762	-1.28173
1553613_s_at	FOXC1	forkhead box C1	NM_001453		0.0010651	0.254299	-1.47846	1.60928e-05	0.00458268	-2.11321	0.000991539	0.135193	-1.42933
228150_at	SEC16B	SEC16 homolog B (S. cerevisiae)	NM_033127		0.00384724	0.481345	-1.47239	2.80249e-05	0.0068096	-2.11393	0.00316928	0.253705	-1.43572
238819_at	ZNF347	zinc finger protein 347	NM_001172674 /// NM_001172675 /// NM_032584 /// XM_005259335 /// XM_005259336 /// XM_00		0.00306367	0.435011	-1.76843	0.000383762	0.0418806	-2.13421	0.095808	0.689722	-1.20684
201811_x_at	SH3BP5	SH3-domain binding protein 5 (BTK-associated)	NM_001018009 /// NM_004844 /// XM_006713420		0.0628798	0.99974	-1.23993	0.00048727	0.0486431	-2.16588	0.0022063	0.218853	-1.74677
226811_at	FAM46C	family with sequence similarity 46, member C	NM_017709		1.23803e-05	0.0107443	-2.26123	3.12079e-06	0.00137604	-2.17188	0.676452	0.909985	1.04114
1569583_at	EREG	epiregulin	NM_001432		0.00136384	0.291282	-1.64091	4.81334e-05	0.0100831	-2.1793	0.0105412	0.418447	-1.32811
227404_s_at	EGR1	early growth response 1	NM_001964		0.546203	0.99974	-1.04476	2.76585e-11	6.87377e-08	-2.22931	3.72232e-10	1.27198e-06	-2.1338
205208_at	ALDH1L1	aldehyde dehydrogenase 1 family, member L1	NM_001270364 /// NM_001270365 /// NM_012190 /// NR_072979 /// XM_006713481 /// XM_00671		0.000825253	0.226328	-1.62782	3.30881e-05	0.00760626	-2.23174	0.00341992	0.26569	-1.37101
217478_s_at	HLA-DMA	major histocompatibility complex, class II, DM alpha	NM_006120		0.00767411	0.658675	-1.52073	0.000254617	0.0327874	-2.24345	0.00685614	0.356109	-1.47525
204135_at	FILIP1L	filamin A interacting protein 1-like	NM_001042459 /// NM_001282793 /// NM_001282794 /// NM_014890 /// NM_182909 /// XM_00671		0.101814	0.99974	1.17548	1.34826e-05	0.00407272	-2.25206	7.96051e-06	0.00544051	-2.64724
209892_at	FUT4	fucosyltransferase 4 (alpha (1,3) fucosyltransferase, myeloid-specific)	NM_002033		0.000507508	0.168021	-2.52214	0.000364684	0.0409152	-2.25242	0.315377	0.795187	1.11975
204469_at	PTPRZ1	protein tyrosine phosphatase, receptor-type, Z polypeptide 1	NM_001206838 /// NM_001206839 /// NM_002851 /// XM_005250519 /// XM_006716076		0.965486	0.99974	-1.00389	0.000376018	0.0415329	-2.25628	0.00054967	0.098397	-2.24753
228372_at	C10orf128	chromosome 10 open reading frame 128	NM_001010863 /// NM_001288740 /// NM_001288741 /// NM_001288742 /// NM_001288743 /// XM		2.11244e-12	1.64997e-08	-1.7009	1.69965e-19	1.32755e-15	-2.25879	1.45667e-07	0.000248885	-1.328
229285_at	RNASEL	ribonuclease L (2',5'-oligoisoadenylate synthetase-dependent)	NM_021133 /// XM_005245411		0.0171651	0.865776	-1.32154	0.000137092	0.0213547	-2.27053	0.00103255	0.138923	-1.7181
209155_s_at	NT5C2	5'-nucleotidase, cytosolic II	NM_001134373 /// NM_012229 /// XM_005269632 /// XM_005269633 /// XM_005269634 /// XM_00		0.00223032	0.364008	-1.61203	0.000151379	0.0232491	-2.2745	0.00481564	0.307588	-1.41095
213260_at	FOXC1	forkhead box C1	NM_001453		0.000279767	0.114458	-1.46906	1.44788e-06	0.000746822	-2.32559	6.4021e-05	0.0226449	-1.58304
201694_s_at	EGR1	early growth response 1	NM_001964		0.0264807	0.982912	-1.31648	6.4222e-06	0.00240503	-2.38246	0.000194405	0.0489819	-1.80972
223378_at	GLIS2	GLIS family zinc finger 2	NM_032575 /// XM_005255641 /// XM_005255642 /// XM_006725240 /// XM_006725241		0.0258929	0.974995	-1.33239	0.00010874	0.0177474	-2.53433	0.000786091	0.121069	-1.90209
210051_at	RAPGEF3	Rap guanine nucleotide exchange factor (GEF) 3	NM_001098531 /// NM_001098532 /// NM_006105 /// XM_005268569 /// XM_005268570 /// XM_00		0.00309951	0.435509	-1.54711	5.75194e-05	0.011311	-2.57529	0.00110478	0.143819	-1.66458
221511_x_at	CCPG1 /// DYX1C1-CCPG1	cell cycle progression 1 /// DYX1C1-CCPG1 readthrough (NMD candidate)	NM_001204450 /// NM_001204451 /// NM_004748 /// NM_020739 /// NR_037923		0.00050639	0.168021	-1.71193	1.10017e-05	0.00352799	-2.60927	0.000966979	0.133595	-1.52417
222156_x_at	CCPG1 /// DYX1C1-CCPG1	cell cycle progression 1 /// DYX1C1-CCPG1 readthrough (NMD candidate)	NM_001204450 /// NM_001204451 /// NM_004748 /// NM_020739 /// NR_037923		0.00464894	0.535117	-1.82285	0.000353743	0.0399765	-2.66553	0.0155941	0.479531	-1.46229
230428_at	--	---	---		0.00256331	0.397023	-1.94847	0.000279909	0.0347819	-2.67031	0.0235288	0.540748	-1.37046
213974_at	ADAMTSL3	ADAMTS-like 3	NM_207517 /// XM_005272435 /// XM_005272436 /// XM_005272437		0.000105407	0.057193	-3.24217	6.77371e-05	0.0125119	-2.83477	0.276078	0.782609	1.14371
205514_at	ZNF415	zinc finger protein 415	NM_001136038 /// NM_001164309 /// NM_018355 /// NR_028343 /// XM_006723267 /// XM_00672		0.000297227	0.11862	-2.59351	7.31055e-05	0.013368	-2.85975	0.342338	0.804601	-1.10266
1555963_x_at	B3GNT7	UDP-GlcNAc:betaGal beta-1,3-N-acetylglucosaminyltransferase 7	NM_145236 /// XM_005246953		0.000711159	0.205565	-2.86172	0.000246505	0.0322432	-3.0588	0.558985	0.872709	-1.06887
206914_at	CRTAM	cytotoxic and regulatory T cell molecule	NM_019604		1.18871e-05	0.0104827	-1.60805	3.65523e-10	6.43873e-07	-3.0636	2.47604e-07	0.000374385	-1.90516
212151_at	PBX1	pre-B-cell leukemia homeobox 1	NM_001204961 /// NM_001204963 /// NM_002585 /// XM_005245228 /// XM_005245229 /// XM_00		3.08075e-05	0.0218753	-2.37709	1.28479e-06	0.000690903	-3.19073	0.00775176	0.378012	-1.34228
211712_s_at	ANXA9	annexin A9	NM_003568 /// XM_005245539		0.000176078	0.0815853	-2.2684	8.27284e-06	0.00286277	-3.23503	0.00653447	0.349023	-1.42613
202555_s_at	MYLK	myosin light chain kinase	NM_005965 /// NM_053025 /// NM_053026 /// NM_053027 /// NM_053028 /// NM_053029 /// NM_		0.390225	0.99974	-1.12318	0.00020123	0.0281712	-3.25245	0.000460683	0.0868547	-2.89576
220413_at	SLC39A2	solute carrier family 39 (zinc transporter), member 2	NM_001256588 /// NM_014579		0.0328544	0.99974	-1.45638	0.000224222	0.0303109	-3.34874	0.00138814	0.165148	-2.29935
227753_at	TMEM139	transmembrane protein 139	NM_001242773 /// NM_001242774 /// NM_001242775 /// NM_001282876 /// NM_001282877 /// NM		0.212595	0.99974	-1.20092	0.000310546	0.0370723	-3.49238	0.000801778	0.122793	-2.90809
232977_x_at	MYH14	myosin, heavy chain 14, non-muscle	NM_001077186 /// NM_001145809 /// NM_024729 /// XM_006723386		0.475895	0.99974	-1.07456	1.76601e-05	0.00485263	-3.49342	3.75079e-05	0.0159517	-3.25101
228993_s_at	BBIP1	BBSome interacting protein 1	NM_001195304 /// NM_001195305 /// NM_001195306 /// NM_001195307 /// NM_001243783		0.137574	0.99974	-1.2585	0.000212161	0.0291455	-3.55744	0.000688002	0.112289	-2.82673
201565_s_at	ID2	inhibitor of DNA binding 2, dominant negative helix-loop-helix protein	NM_002166		0.0383968	0.99974	-1.51664	0.000340635	0.0391795	-3.56401	0.00226877	0.222302	-2.34994
207057_at	SLC16A7	solute carrier family 16 (monocarboxylate transporter), member 7	NM_001270622 /// NM_001270623 /// NM_004731 /// NR_073055 /// NR_073056 /// XM_00526923		0.00524756	0.567651	-2.04796	0.000157424	0.0234703	-3.65669	0.00806035	0.381176	-1.78552
225502_at	DOCK8	dedicator of cytokinesis 8	NM_001190458 /// NM_001193536 /// NM_203447		0.394746	0.99974	-1.13312	0.000398964	0.0430244	-3.72031	0.000807845	0.123226	-3.28324
234290_x_at	MYH14	myosin, heavy chain 14, non-muscle	NM_001077186 /// NM_001145809 /// NM_024729 /// XM_006723386		0.701556	0.99974	-1.0574	0.000372327	0.0412781	-3.72336	0.000627371	0.108207	-3.52124
206028_s_at	MERTK	MER proto-oncogene, tyrosine kinase	NM_006343 /// XM_005263565 /// XM_005263568		0.0168105	0.865776	-1.84974	0.000456329	0.0472212	-3.78926	0.00685016	0.356109	-2.04854
205817_at	SIX1	SIX homeobox 1	NM_005982		0.000149531	0.0736541	-4.09663	7.59324e-05	0.0137017	-3.83649	0.568598	0.87554	1.06781
231579_s_at	TIMP2	TIMP metallopeptidase inhibitor 2	NM_003255		7.21385e-05	0.0453353	-2.64031	2.62594e-06	0.00120977	-4.26198	0.00162616	0.183758	-1.61419
226988_s_at	MYH14	myosin, heavy chain 14, non-muscle	NM_001077186 /// NM_001145809 /// NM_024729 /// XM_006723386		0.843054	0.99974	-1.03186	0.000198472	0.0280647	-4.39205	0.000322041	0.0707133	-4.25646
204385_at	KYNU	kynureninase	NM_001032998 /// NM_001199241 /// NM_003937		0.000876436	0.233752	-4.90951	0.000316875	0.0377454	-5.7882	0.289037	0.786857	-1.17898
224516_s_at	CXXC5	CXXC finger protein 5	NM_016463 /// XM_005268461 /// XM_005268462 /// XM_006714786		0.00192734	0.342329	-3.5626	0.000260659	0.0328656	-5.8363	0.0337857	0.585123	-1.63821
212148_at	PBX1	pre-B-cell leukemia homeobox 1	NM_001204961 /// NM_001204963 /// NM_002585 /// XM_005245228 /// XM_005245229 /// XM_00		0.00126706	0.277106	-3.66047	0.000125386	0.0198709	-6.11092	0.0296426	0.568305	-1.66944
231969_at	STOX2	storkhead box 2	NM_020225 /// XM_005263142		0.853626	0.99974	1.02437	2.24539e-05	0.00573676	-6.80123	3.23641e-05	0.0142702	-6.96697
210663_s_at	KYNU	kynureninase	NM_001032998 /// NM_001199241 /// NM_003937		9.95029e-06	0.00891856	-6.73143	3.23793e-06	0.00141627	-7.0613	0.637137	0.89796	-1.049
228176_at	S1PR3	sphingosine-1-phosphate receptor 3	NM_005226		0.38273	0.99974	-1.26619	0.000507923	0.0498576	-7.8887	0.00116149	0.147001	-6.23026
209283_at	CRYAB	crystallin, alpha B	NM_001289807 /// NM_001289808 /// NM_001885		0.00714657	0.645849	1.26532	1.64649e-14	8.18379e-11	-7.93021	1.42952e-14	9.76991e-11	-10.0343
210096_at	CYP4B1	cytochrome P450, family 4, subfamily B, polypeptide 1	NM_000779 /// NM_001099772		0.00463838	0.535028	-3.67618	0.000329483	0.0384925	-8.28127	0.0168756	0.489949	-2.25269
212092_at	PEG10	paternally expressed 10	NM_001040152 /// NM_001172437 /// NM_001172438 /// NM_001184961 /// NM_001184962 /// NM		0.000248555	0.107006	-8.77172	0.000109933	0.0178887	-8.70352	0.965313	0.99141	1.00784
228969_at	AGR2	anterior gradient 2	NM_006408 /// XM_005249581		0.000334239	0.129606	-5.68494	4.69995e-05	0.00988346	-10.3478	0.0118504	0.436357	-1.82022
221024_s_at	SLC2A10	solute carrier family 2 (facilitated glucose transporter), member 10	NM_030777 /// XM_006723879 /// XM_006723880 /// XR_430314		0.000992251	0.247776	-7.84351	0.000243979	0.032123	-10.8931	0.21352	0.762288	-1.3888
210064_s_at	UPK1B	uroplakin 1B	NM_006952		0.0610533	0.99974	-1.77916	0.000107466	0.017592	-11.1449	0.000536024	0.0967232	-6.26415
203608_at	ALDH5A1	aldehyde dehydrogenase 5 family, member A1	NM_001080 /// NM_170740		9.6906e-16	2.64917e-11	-8.87866	6.94844e-18	3.79906e-14	-11.4969	0.000772239	0.120291	-1.29489
205319_at	PSCA	prostate stem cell antigen	NM_005672 /// NR_033343		3.16463e-15	5.76754e-11	-7.62004	7.67003e-19	5.24199e-15	-11.6714	0.000188283	0.0476592	-1.53167
227148_at	PLEKHH2	pleckstrin homology domain containing, family H (with MyTH4 domain) member 2	NM_172069 /// XM_005264140 /// XM_006711941 /// XR_244923 /// XR_244924 /// XR_426981		0.0120888	0.778508	-2.29308	0.000158136	0.0234948	-12.166	0.000872149	0.12615	-5.30554
239058_at	FOXC2	forkhead box C2 (MFH-1, mesenchyme forkhead 1)	NM_005251		0.00972471	0.722416	-2.94348	0.000293998	0.0360411	-12.6251	0.00263611	0.239346	-4.28919
203186_s_at	S100A4	S100 calcium binding protein A4	NM_002961 /// NM_019554		0.329029	0.99974	-1.26781	0.000322794	0.0381182	-12.6939	0.000620331	0.107672	-10.0124
219743_at	HEY2	hes-related family bHLH transcription factor with YRPW motif 2	NM_012259 /// XM_005266878 /// XM_006715428		0.000236042	0.104077	-9.08722	4.4662e-05	0.00950154	-17.3391	0.0116589	0.436067	-1.90808
222921_s_at	HEY2	hes-related family bHLH transcription factor with YRPW motif 2	NM_012259 /// XM_005266878 /// XM_006715428		8.00197e-05	0.0486119	-10.7047	1.60106e-05	0.00458268	-19.0629	0.009765	0.408181	-1.7808
217388_s_at	KYNU	kynureninase	NM_001032998 /// NM_001199241 /// NM_003937		0.000613187	0.191577	-17.398	0.000244999	0.032123	-20.1462	0.57202	0.877318	-1.15797
228347_at	SIX1	SIX homeobox 1	NM_005982		1.57078e-05	0.0126298	-37.1138	9.47527e-06	0.0031979	-26.7516	0.135632	0.723984	1.38735
209173_at	AGR2	anterior gradient 2	NM_006408 /// XM_005249581		3.3386e-06	0.00467043	-4.62427	1.35375e-09	2.00045e-06	-28.0302	4.10229e-07	0.000547056	-6.06154
212681_at	EPB41L3	erythrocyte membrane protein band 4.1-like 3	NM_001281533 /// NM_001281534 /// NM_001281535 /// NM_012307 /// XM_005258085 /// XM_00		0.00044729	0.157778	-27.5062	0.000209065	0.0288653	-30.4366	0.659442	0.904921	-1.10654
205646_s_at	PAX6	paired box 6	NM_000280 /// NM_001127612 /// NM_001258462 /// NM_001258463 /// NM_001258464 /// NM_00		0.185619	0.99974	-1.55353	0.000404219	0.0434198	-30.6677	0.000837007	0.12402	-19.7406
206710_s_at	EPB41L3	erythrocyte membrane protein band 4.1-like 3	NM_001281533 /// NM_001281534 /// NM_001281535 /// NM_012307 /// XM_005258085 /// XM_00		0.00115421	0.259697	-30.4263	0.000476374	0.0481437	-40.3301	0.376368	0.8148	-1.3255
212094_at	PEG10	paternally expressed 10	NM_001040152 /// NM_001172437 /// NM_001172438 /// NM_001184961 /// NM_001184962 /// NM		1.52722e-05	0.0124628	-98.3599	5.72932e-06	0.00219056	-98.3373	0.999281	0.999844	1.00023
235795_at	PAX6	paired box 6	NM_000280 /// NM_001127612 /// NM_001258462 /// NM_001258463 /// NM_001258464 /// NM_00		0.200297	0.99974	-1.65365	0.000195122	0.0277099	-195.811	0.000358137	0.0741709	-118.412
