# Supplementary material for: SOX2 Is a Univocal Marker for Human Oral Mucosa Epithelium Useful in Post-COMET Patient Characterization
Source: Int J Mol Sci. 2022 May 21;23(10):5785. doi: 10.3390/ijms23105785 (PMC9144017; doi:10.3390/ijms23105785)
Supplement: Supplementary file 1 [file ijms-23-05785-s001.zip › Spreadsheet S2.xlsx]

## Sheet: Table S2
Spreadsheet S2. Differentially expressed in oral mucosa vs limbus (Fold Change contrast=2; FDR<0.05)
Probeset ID	Gene Symbol	Gene Title	RefSeq Transcript ID	p-value(LIMBUS vs. CONJUNCTIVA)	stepup(p-value(LIMBUS vs. CONJUNCTIVA))	Fold-Change(LIMBUS vs. CONJUNCTIVA)	p-value(ORAL vs. CONJUNCTIVA)	stepup(p-value(ORAL vs. CONJUNCTIVA))	Fold-Change(ORAL vs. CONJUNCTIVA)	p-value(ORAL vs. LIMBUS)	stepup(p-value(ORAL vs. LIMBUS))	Fold-Change(ORAL vs. LIMBUS)
207558_s_at	PITX2	paired-like homeodomain 2	NM_000325 /// NM_001204397 /// NM_001204398 /// NM_001204399 /// NM_153426 /// NM_15342	0.311963	0.99974	1.17397	1.98982e-05	0.00528124	77.2803	3.06125e-05	0.0137191	65.8282
228038_at	SOX2	SRY (sex determining region Y)-box 2	NM_003106	0.468727	0.99974	1.09152	1.64264e-06	0.000805445	33.0998	2.73566e-06	0.00240278	30.3244
1557779_at	LOC101928687	uncharacterized LOC101928687	NR_120641 /// NR_120642 /// XR_246116 /// XR_247522 /// XR_252750	0.261145	0.99974	1.11753	1.16225e-10	2.26949e-07	6.35635	6.13206e-10	1.86261e-06	5.68787
1563933_a_at	PLD5	phospholipase D family, member 5	NM_001195811 /// NM_001195812 /// NM_152666 /// XM_006711752	0.245694	0.99974	1.27323	5.82364e-05	0.0113717	6.50403	0.000181603	0.0466158	5.10829
237435_at	---	---	---	0.137507	0.99974	-1.21633	2.06799e-05	0.00543594	3.03269	1.41162e-05	0.00779601	3.68875
204602_at	DKK1	dickkopf WNT signaling pathway inhibitor 1	NM_012242	0.00111061	0.258069	1.23342	3.75965e-21	4.11118e-17	3.66125	3.97846e-18	1.08761e-13	2.96837
213721_at	SOX2	SRY (sex determining region Y)-box 2	NM_003106	0.317056	0.99974	1.06134	8.6297e-07	0.000491488	2.71736	2.10722e-06	0.0020065	2.56032
238025_at	MLKL	mixed lineage kinase domain-like	NM_001142497 /// NM_152649 /// XM_005255834 /// XR_243397 /// XR_429715 /// XR_429716	0.000167331	0.0795548	-1.5272	8.248e-05	0.0145003	1.47966	2.01157e-06	0.00196397	2.25974
231259_s_at	CCND2	cyclin D2	NM_001759 /// XM_005253813	0.000478115	0.164408	1.73776	1.54106e-06	0.000786288	3.61684	6.01327e-05	0.02163	2.08133
233126_s_at	OLAH	oleoyl-ACP hydrolase	NM_001039702 /// NM_018324 /// XM_006717456	0.298261	0.99974	1.10948	5.38869e-05	0.0107922	2.30369	0.000178942	0.0465119	2.07637
240994_at	---	---	---	0.350872	0.99974	1.06498	5.77187e-05	0.011311	2.1545	0.000125362	0.0358629	2.02304
231721_at	JAM3	junctional adhesion molecule 3	NM_001205329 /// NM_032801	0.00423544	0.512329	1.43576	0.00171819	0.0969331	-1.44154	0.000122167	0.0352719	-2.0697
235147_at	---	---	---	0.000102213	0.0570255	1.93489	0.167071	0.535442	-1.09262	2.91539e-05	0.0132832	-2.1141
227404_s_at	EGR1	early growth response 1	NM_001964	0.546203	0.99974	-1.04476	2.76585e-11	6.87377e-08	-2.22931	3.72232e-10	1.27198e-06	-2.1338
1555416_a_at	ALOX15B	arachidonate 15-lipoxygenase, type B	NM_001039130 /// NM_001039131 /// NM_001141	0.0118823	0.774247	1.4637	0.00389373	0.142893	-1.47515	0.00011719	0.0348225	-2.15919
228235_at	MIR424 /// MIR503HG	microRNA 424 /// MIR503 host gene (non-protein coding)	NM_032762 /// NR_024607 /// NR_029946	0.0105182	0.742044	1.34084	0.000441764	0.0461474	-1.62681	7.07765e-05	0.0238871	-2.18129
1552685_a_at	GRHL1	grainyhead-like 1 (Drosophila)	NM_198182 /// XM_005246158 /// XM_005246159 /// XM_006711882 /// XM_006711883 /// XM_00	0.0345209	0.99974	1.13196	9.41628e-10	1.47096e-06	-1.97746	4.03199e-10	1.29676e-06	-2.23841
1554966_a_at	FILIP1L	filamin A interacting protein 1-like	NM_001042459 /// NM_001282793 /// NM_001282794 /// NM_014890 /// NM_182909 /// XM_00671	0.0894918	0.99974	1.12937	1.64993e-06	0.000805445	-2.01943	1.0592e-06	0.00123216	-2.28069
227812_at	TNFRSF19	tumor necrosis factor receptor superfamily, member 19	NM_001204458 /// NM_001204459 /// NM_018647 /// NM_148957 /// XM_005266445 /// XM_00526	2.42849e-05	0.0184414	1.70597	5.33437e-05	0.0107227	-1.49617	1.27244e-08	2.78282e-05	-2.55242
204135_at	FILIP1L	filamin A interacting protein 1-like	NM_001042459 /// NM_001282793 /// NM_001282794 /// NM_014890 /// NM_182909 /// XM_00671	0.101814	0.99974	1.17548	1.34826e-05	0.00407272	-2.25206	7.96051e-06	0.00544051	-2.64724
207038_at	SLC16A6	solute carrier family 16, member 6	NM_001174166 /// NM_004694 /// XM_005257789 /// XM_006722169	0.000677975	0.202559	2.03216	0.00381876	0.142359	-1.4721	5.8875e-05	0.0214599	-2.99155
232977_x_at	MYH14	myosin, heavy chain 14, non-muscle	NM_001077186 /// NM_001145809 /// NM_024729 /// XM_006723386	0.475895	0.99974	-1.07456	1.76601e-05	0.00485263	-3.49342	3.75079e-05	0.0159517	-3.25101
224209_s_at	GDA	guanine deaminase	NM_001242505 /// NM_001242506 /// NM_001242507 /// NM_004293 /// XM_005252317 /// XM_00	0.000499387	0.168021	2.8715	0.0802939	0.421042	-1.2559	0.000125938	0.0358629	-3.60632
209173_at	AGR2	anterior gradient 2	NM_006408 /// XM_005249581	3.3386e-06	0.00467043	-4.62427	1.35375e-09	2.00045e-06	-28.0302	4.10229e-07	0.000547056	-6.06154
231969_at	STOX2	storkhead box 2	NM_020225 /// XM_005263142	0.853626	0.99974	1.02437	2.24539e-05	0.00573676	-6.80123	3.23641e-05	0.0142702	-6.96697
209283_at	CRYAB	crystallin, alpha B	NM_001289807 /// NM_001289808 /// NM_001885	0.00714657	0.645849	1.26532	1.64649e-14	8.18379e-11	-7.93021	1.42952e-14	9.76991e-11	-10.0343
