# Supplementary material for: SOX2 Is a Univocal Marker for Human Oral Mucosa Epithelium Useful in Post-COMET Patient Characterization
Source: Int J Mol Sci. 2022 May 21;23(10):5785. doi: 10.3390/ijms23105785 (PMC9144017; doi:10.3390/ijms23105785)
Supplement: Supplementary file 1 [file ijms-23-05785-s001.zip › Spreadsheet S3.xlsx]

## Sheet: Table S3
Spreadsheet S3. Differentially expressed in limbus vs conjunctiva (Fold Change contrast=2; FDR<0.05)
Probeset ID	Gene Symbol	Gene Title	RefSeq Transcript ID	p-value(LIMBUS vs. CONJUNCTIVA)	stepup(p-value(LIMBUS vs. CONJUNCTIVA))	Fold-Change(LIMBUS vs. CONJUNCTIVA)	p-value(ORAL vs. CONJUNCTIVA)	stepup(p-value(ORAL vs. CONJUNCTIVA))	Fold-Change(ORAL vs. CONJUNCTIVA)	p-value(ORAL vs. LIMBUS)	stepup(p-value(ORAL vs. LIMBUS))	Fold-Change(ORAL vs. LIMBUS)
211964_at	COL4A2	collagen, type IV, alpha 2	NM_001846	1.85613e-06	0.00306706	6.10896	1.40294e-07	0.000109579	8.71772	0.0151528	0.47447	1.42704
211980_at	COL4A1	collagen, type IV, alpha 1	NM_001845	9.05513e-19	4.95089e-14	4.86085	2.32721e-23	6.36202e-19	7.03821	3.41817e-06	0.00278938	1.44794
227724_at	LOC101060691 /// NUTM2A-AS1	uncharacterized LOC101060691 /// NUTM2A antisense RNA 1	NR_024397 /// NR_120611 /// NR_120612 /// NR_120613 /// XR_252774 /// XR_424137 /// XR_	1.85832e-05	0.0147252	2.21787	0.0301382	0.304882	1.13566	2.61873e-05	0.012343	-1.95294
226811_at	FAM46C	family with sequence similarity 46, member C	NM_017709	1.23803e-05	0.0107443	-2.26123	3.12079e-06	0.00137604	-2.17188	0.676452	0.909985	1.04114
212151_at	PBX1	pre-B-cell leukemia homeobox 1	NM_001204961 /// NM_001204963 /// NM_002585 /// XM_005245228 /// XM_005245229 /// XM_00	3.08075e-05	0.0218753	-2.37709	1.28479e-06	0.000690903	-3.19073	0.00775176	0.378012	-1.34228
231579_s_at	TIMP2	TIMP metallopeptidase inhibitor 2	NM_003255	7.21385e-05	0.0453353	-2.64031	2.62594e-06	0.00120977	-4.26198	0.00162616	0.183758	-1.61419
209173_at	AGR2	anterior gradient 2	NM_006408 /// XM_005249581	3.3386e-06	0.00467043	-4.62427	1.35375e-09	2.00045e-06	-28.0302	4.10229e-07	0.000547056	-6.06154
210663_s_at	KYNU	kynureninase	NM_001032998 /// NM_001199241 /// NM_003937	9.95029e-06	0.00891856	-6.73143	3.23793e-06	0.00141627	-7.0613	0.637137	0.89796	-1.049
205319_at	PSCA	prostate stem cell antigen	NM_005672 /// NR_033343	3.16463e-15	5.76754e-11	-7.62004	7.67003e-19	5.24199e-15	-11.6714	0.000188283	0.0476592	-1.53167
203608_at	ALDH5A1	aldehyde dehydrogenase 5 family, member A1	NM_001080 /// NM_170740	9.6906e-16	2.64917e-11	-8.87866	6.94844e-18	3.79906e-14	-11.4969	0.000772239	0.120291	-1.29489
222921_s_at	HEY2	hes-related family bHLH transcription factor with YRPW motif 2	NM_012259 /// XM_005266878 /// XM_006715428	8.00197e-05	0.0486119	-10.7047	1.60106e-05	0.00458268	-19.0629	0.009765	0.408181	-1.7808
228347_at	SIX1	SIX homeobox 1	NM_005982	1.57078e-05	0.0126298	-37.1138	9.47527e-06	0.0031979	-26.7516	0.135632	0.723984	1.38735
212094_at	PEG10	paternally expressed 10	NM_001040152 /// NM_001172437 /// NM_001172438 /// NM_001184961 /// NM_001184962 /// NM	1.52722e-05	0.0124628	-98.3599	5.72932e-06	0.00219056	-98.3373	0.999281	0.999844	1.00023
