# Supplementary figures and images for: SOX2 Is a Univocal Marker for Human Oral Mucosa Epithelium Useful in Post-COMET Patient Characterization
Source: MDPI journal article supplement (doi:10.3390/ijms23105785), 2022-05-21

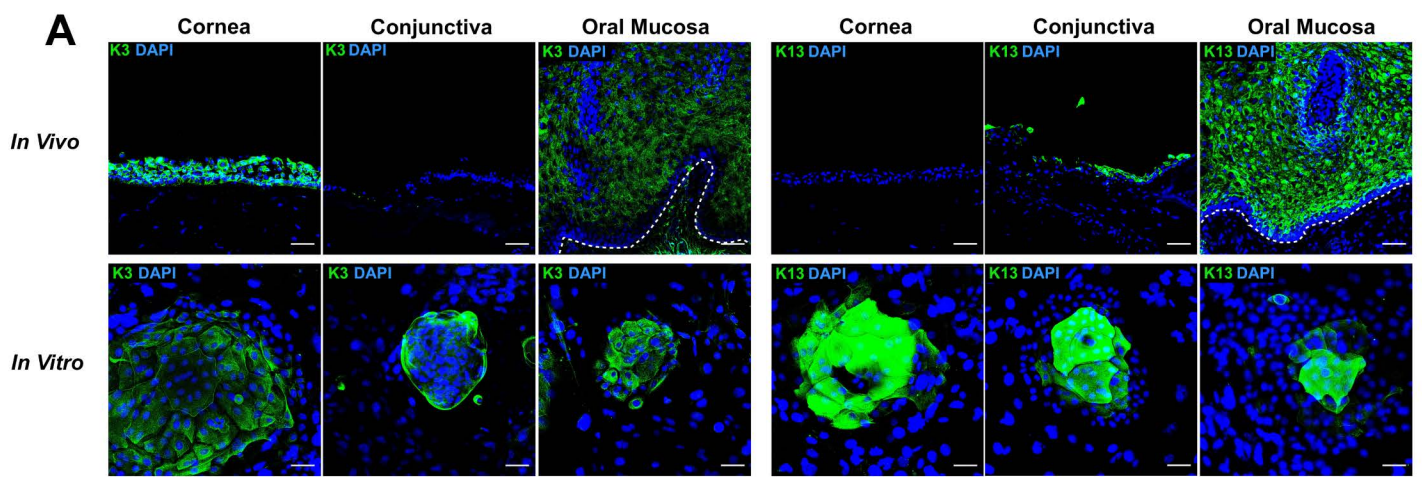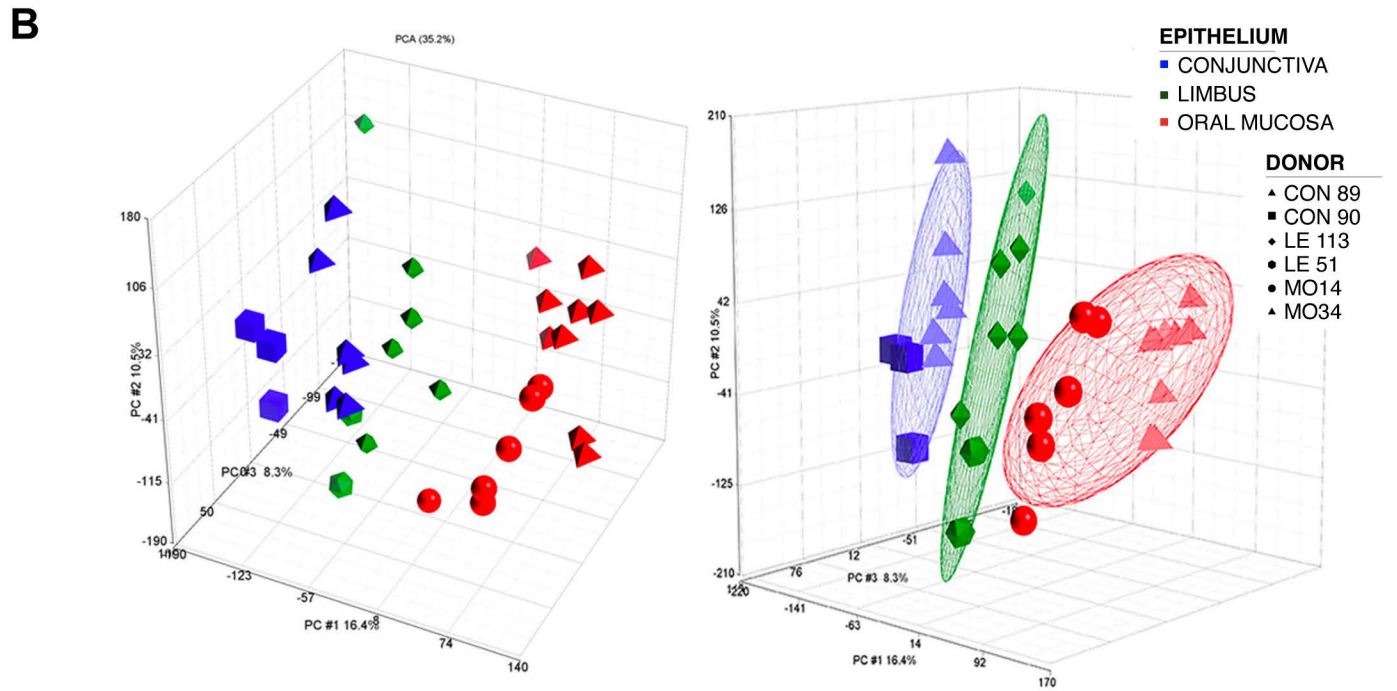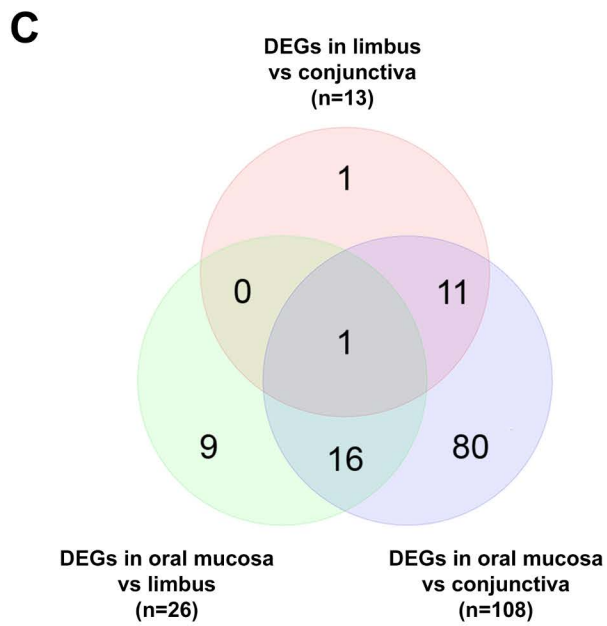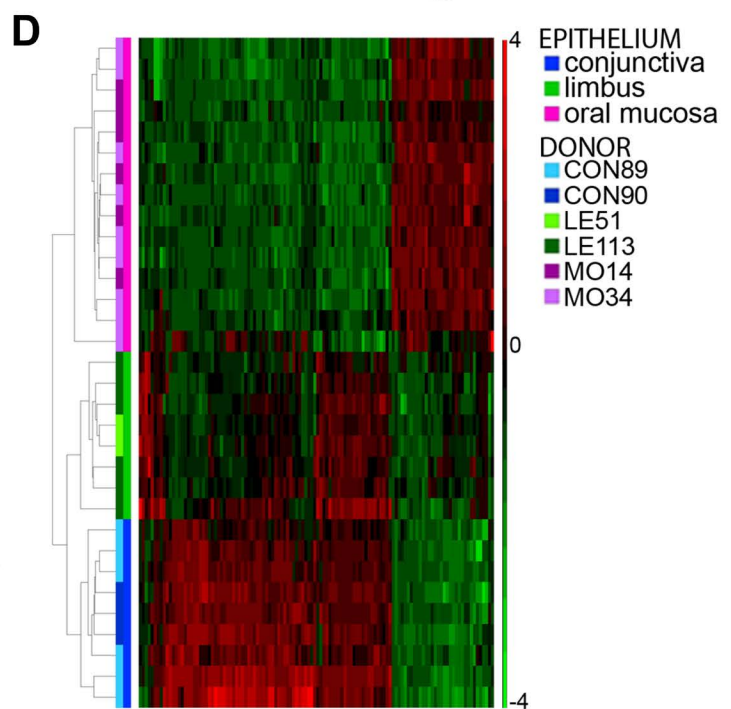

Supplement: s1 [file s1]

**A**

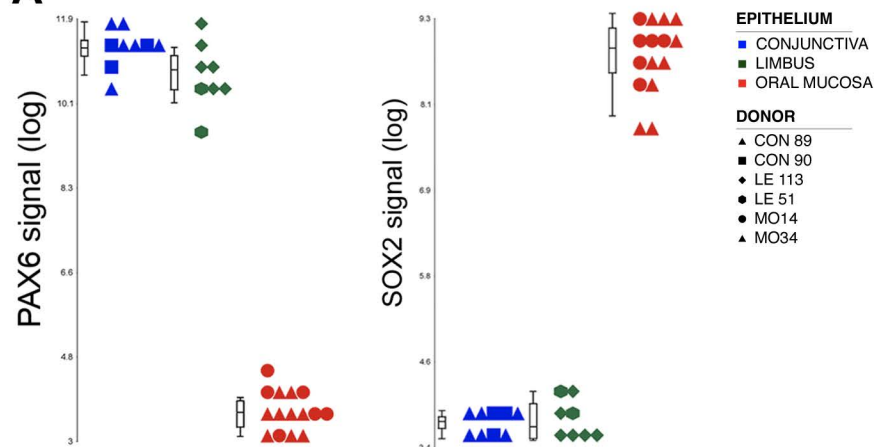

**B**

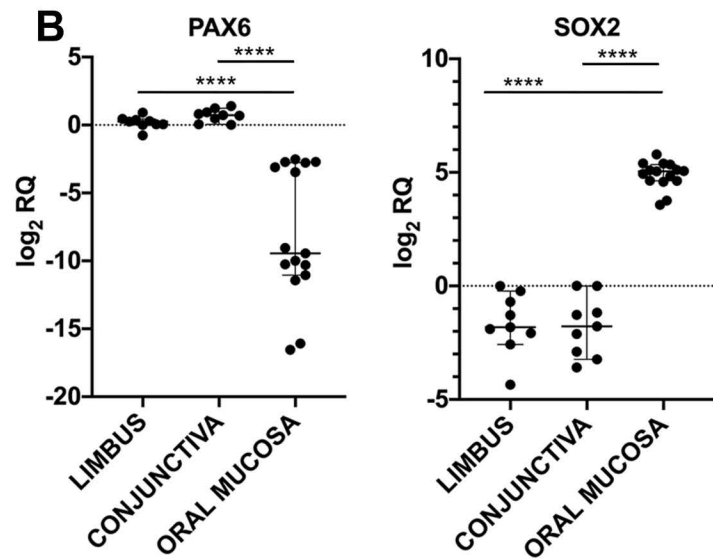

Supplement: s1 [file s1]

**A**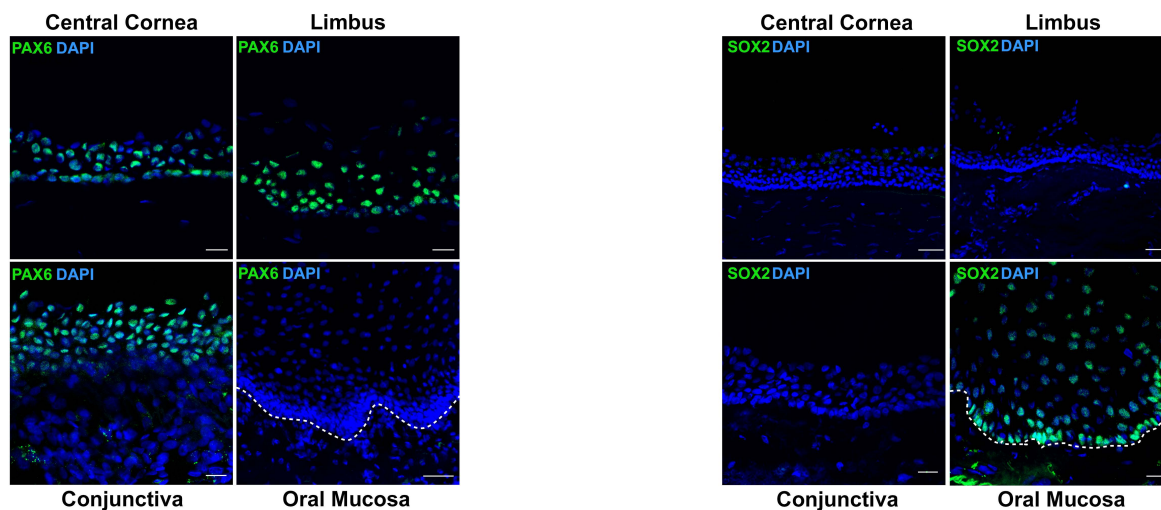**B**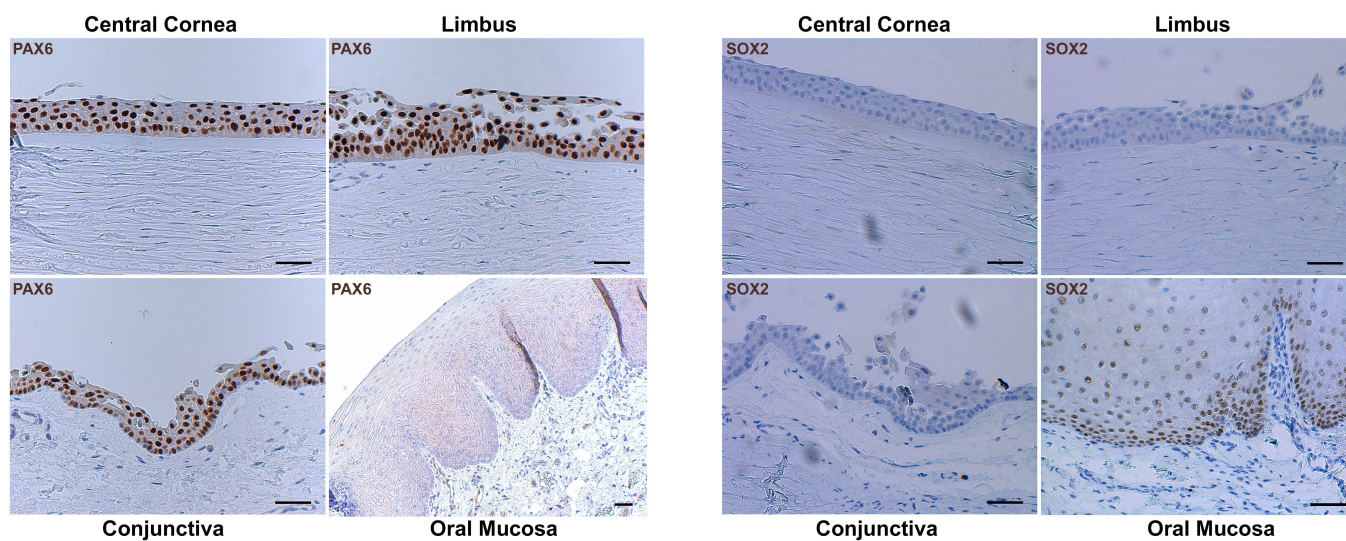**C**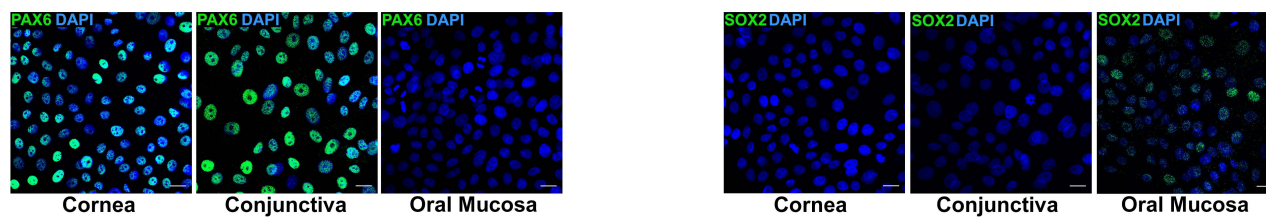**D**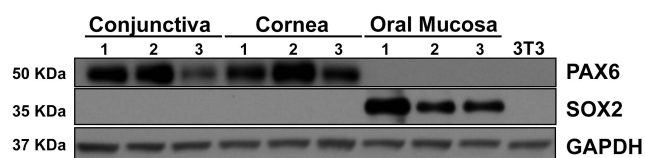**E**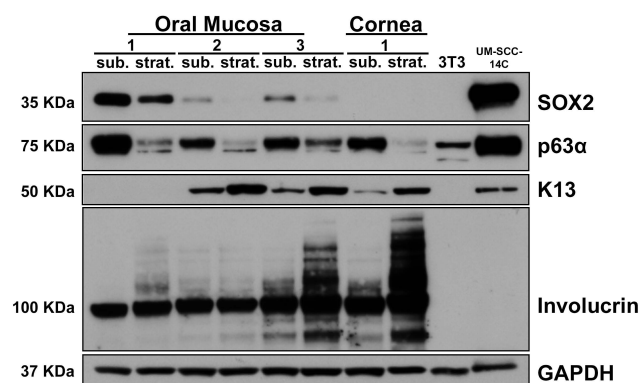

Supplement: s1 [file s1]

**A**

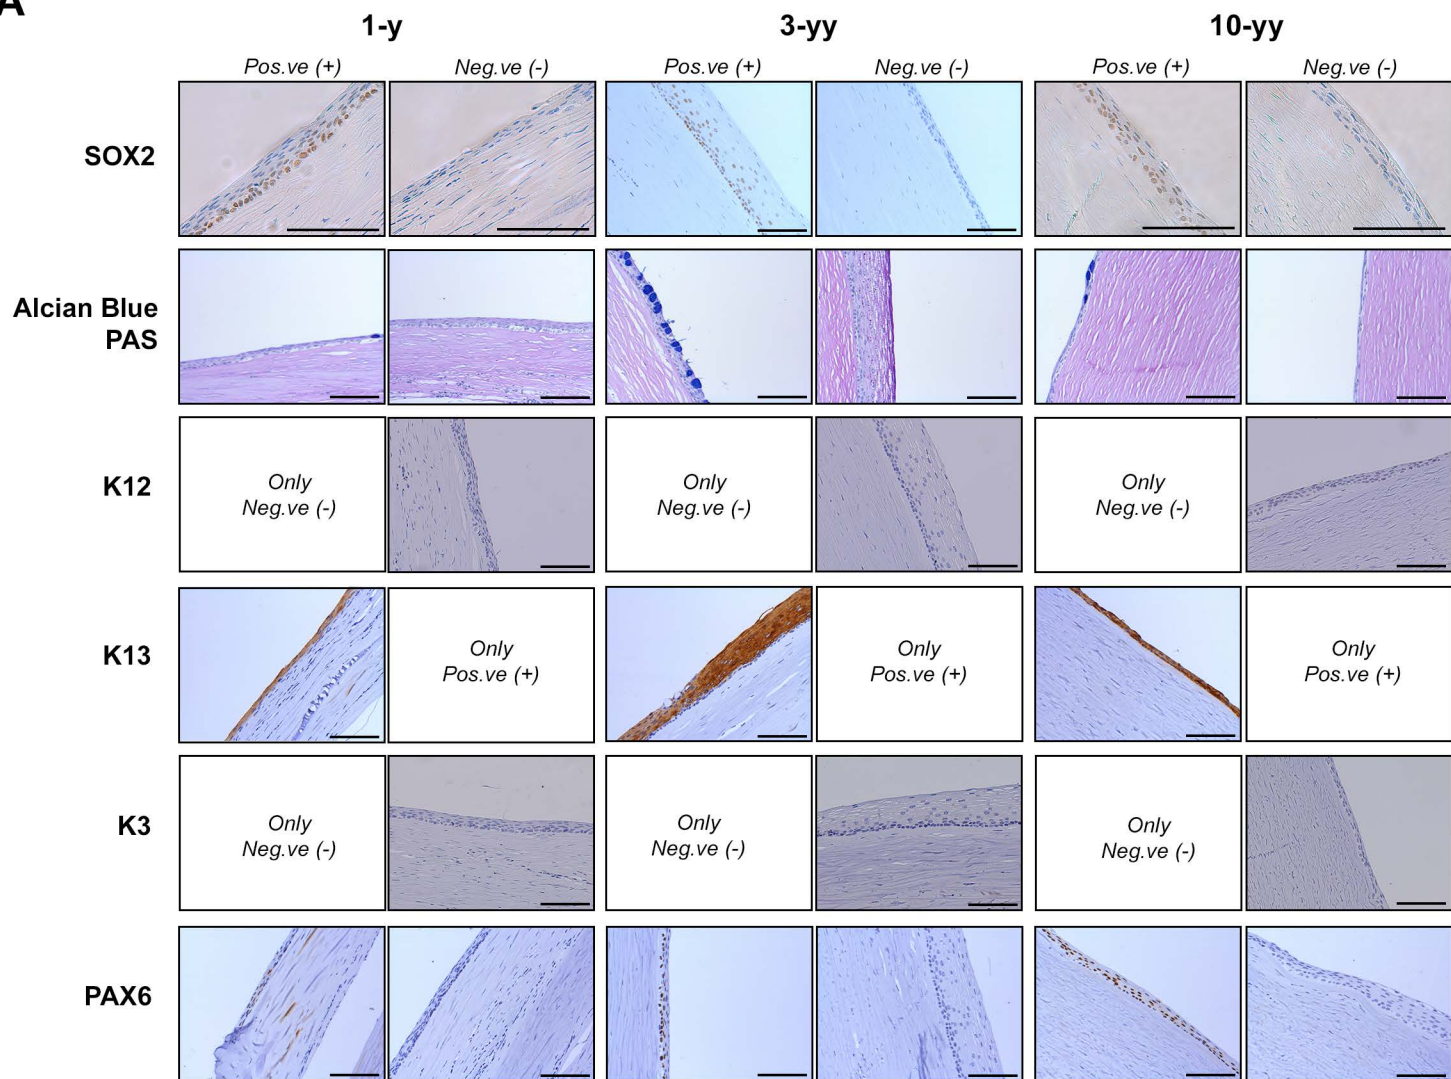

**B**

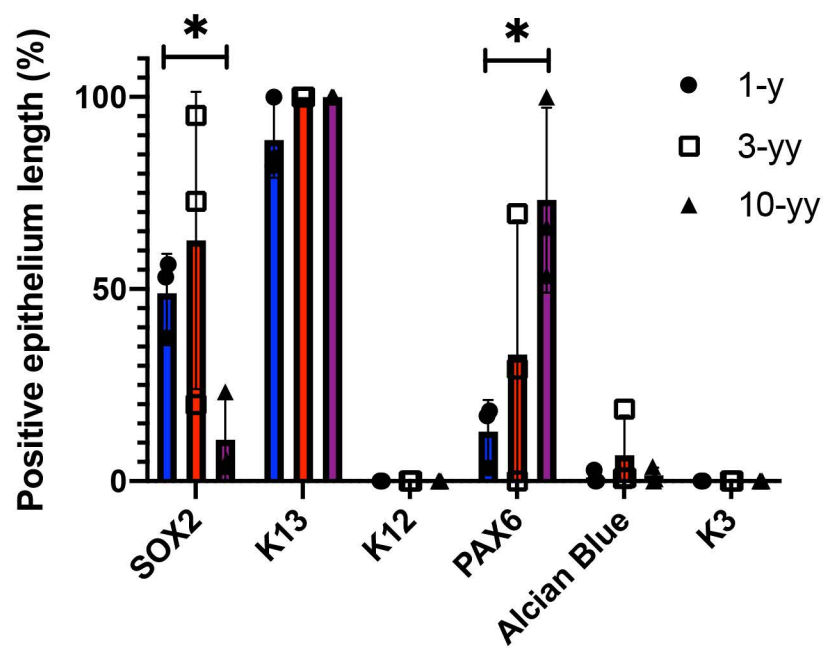

Supplement: s1 [file s1]

**A**

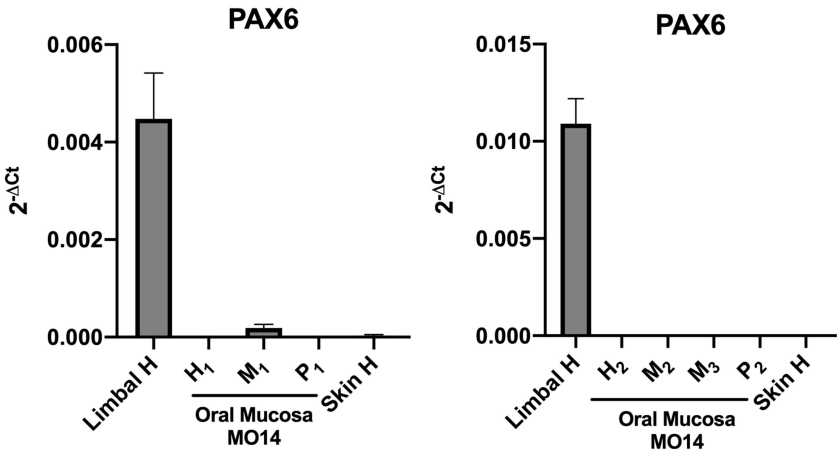

**B**

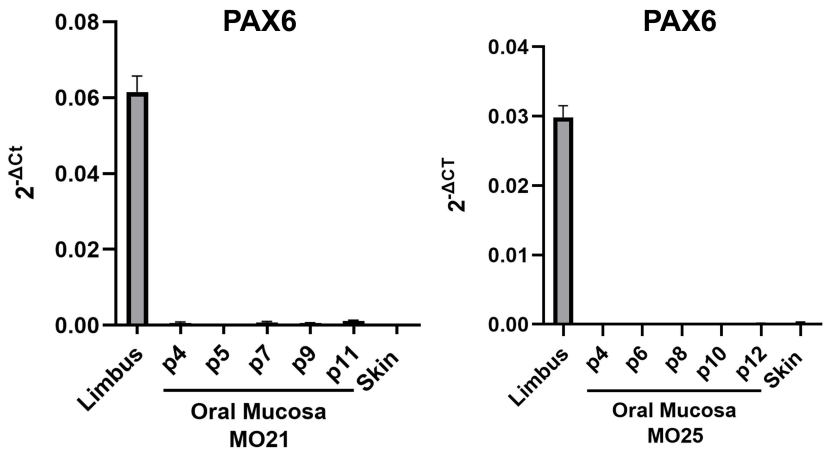

Supplement: s1 [file s1]
